# Supplementary material for: Tunable Optical Diffusers Based on the UV/Ozone-Assisted Self-Wrinkling of Thermal-Cured Polymer Films
Source: MDPI journal article supplement (doi:10.3390/s21175820), 2021-08-30
Supplement: s1 [file s1]

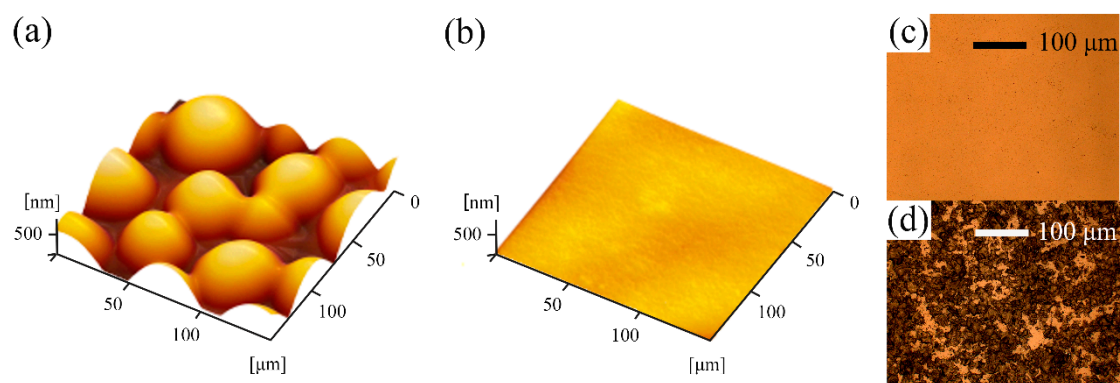

**Figure S1.** AFM images of (a) the typical self-wrinkle structures and (b) the bare PDMS sample without self-wrinkle structures. The optical micrographs of (c) smooth glass substrate and (d) frosted glass substrate.

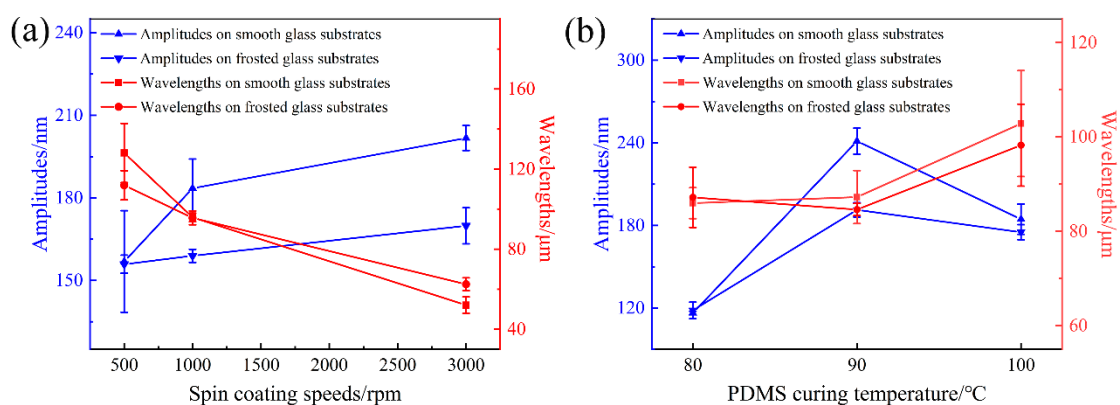

**Figure S2.** The relationships of wavelengths and amplitudes along with the (a) spin-coating speed and (b) PDMS curing temperature on the smooth glass substrates and frosted glass substrates, respectively.

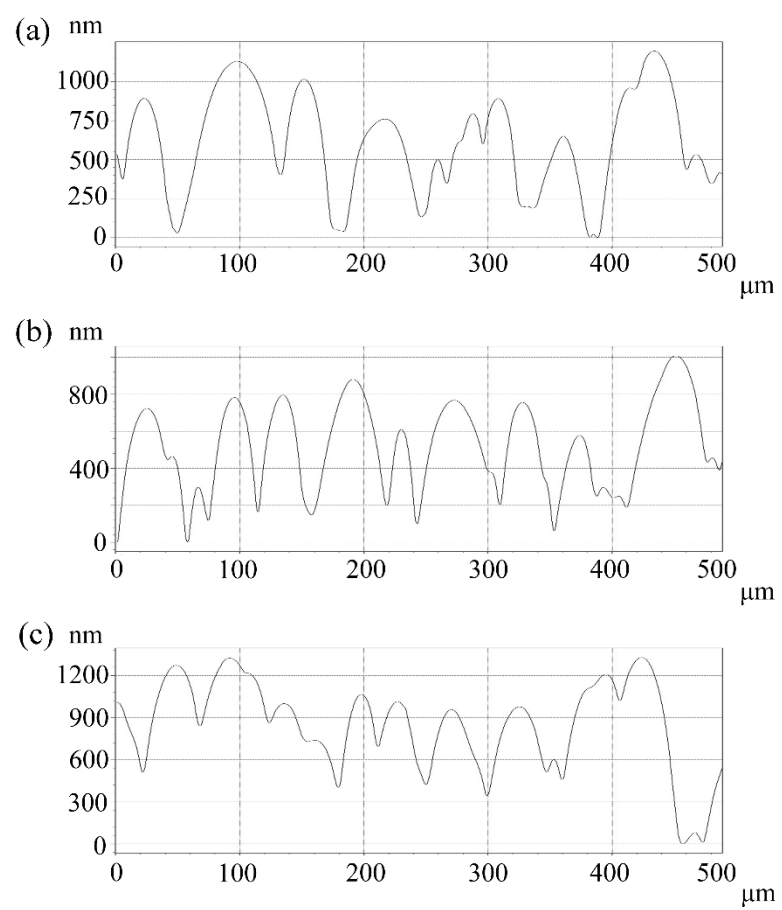

**Figure S3.** Cross-sectional profiles of different areas of the self-wrinkle structure sample.
